# Supplementary material for: Integrating palaeoclimate time series with rich metadata for uncertainty modelling: strategy and documentation of the PalMod 130k marine palaeoclimate data synthesis
Source: Copernicus journal article supplement (doi:10.5194/essd-12-1053-2020), 2020-05-11
Supplement: Supplementary file 1 [file essd-12-1053-2020-supplement.pdf]

Supplement of Earth Syst. Sci. Data, 12, 1053–1081, 2020  
<https://doi.org/10.5194/essd-12-1053-2020-supplement>  
© Author(s) 2020. This work is distributed under  
the Creative Commons Attribution 4.0 License.

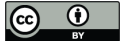

Open Access  
Earth System  
Science  
Data

*Supplement of*

## **Integrating palaeoclimate time series with rich metadata for uncertainty modelling: strategy and documentation of the PalMod 130k marine palaeoclimate data synthesis**

**Lukas Jonkers et al.**

*Correspondence to:* Lukas Jonkers ([ljonkers@marum.de](mailto:ljonkers@marum.de))

The copyright of individual parts of the supplement might differ from the CC BY 4.0 License.

Search keywords used to obtain data from pangaea.de

|                          |                               |
|--------------------------|-------------------------------|
| 13C                      | melonis                       |
| 14C                      | Mg/Ca                         |
| 18O                      | Nd                            |
| Age                      | Neodymium                     |
| Age AND model            | opal                          |
| alkenone                 | organic AND carbon            |
| B/Ca                     | Pa/Th                         |
| Ba/Ca                    | pachyderma                    |
| bulloides                | planktic AND foraminifera     |
| C14                      | planktonic AND foraminifera   |
| carbonate                | protactinium                  |
| Cd/Ca                    | radiocarbon                   |
| chronology               | ruber                         |
| cibicides                | sacculifer                    |
| cibicidoides             | sortable AND silt             |
| d11B                     | SST                           |
| d13C                     | SST AND summer                |
| d18O                     | SST AND winter                |
| delta AND 11B            | stable AND carbon AND isotope |
| delta AND 13C            | stable AND oxygen AND isotope |
| delta AND 18O            | TEX86                         |
| dinoflagellate           | truncatulinoides              |
| dry AND bulk AND density | UK'37                         |
| duertrei                 | UK37                          |
| incompta                 | uvigerina                     |
| inorganic AND carbon     | XRF                           |
| IRD                      |                               |
